# Supplementary material for: Patient Knowledge and Attitudes towards Genetic Testing in Parkinson’s Disease Subjects with Deep Brain Stimulation
Source: Hindawi journal article supplement (doi:10.1155/2019/3494609), 2019-04-21
Supplement: f1 [file 3494609.f1.pdf]

## Supplementary Material. Genetics Attitudes Questionnaire (GAQ)

### Knowledge regarding genetic testing:

Please indicate whether you believe the statements below to be TRUE or FALSE.

1. Scientists have identified genes that are associated with a higher risk of developing Parkinson disease.
2. A genetic test for Parkinson disease is capable of providing the age at which symptoms will develop.
3. A genetic test for Parkinson disease is capable of predicting disease severity.
4. A genetic test for Parkinson disease is capable of predicting with absolute certainty whether or not one will develop Parkinson disease
5. If you have a mutation in a gene that is associated with Parkinson disease, all of your children will also have the mutation.
6. If you have a mutation in a gene that is associated with Parkinson disease, all of your children will also have Parkinson Disease.
7. There are genetic tests presently available to diagnose and/or identify individuals at risk for depression.
8. There are genetic tests presently available to diagnose and/or identify individuals at risk for cystic fibrosis.
9. There are genetic tests presently available to diagnose and/or identify individuals at risk for breast cancer.
10. There are genetic tests presently available to diagnose and/or identify individuals at risk for heart attack.
11. There are genetic tests presently available to diagnose and/or identify individuals at risk for diabetes.
12. There are genetic tests presently available to diagnose and/or identify individuals at risk for Huntington's disease.
13. There are genetic tests presently available to diagnose and/or identify individuals at risk for Gaucher disease.

### Attitudes towards genetic testing:

|                                                                                                                                                                                 | Not important at all | Somewhat important | Very important | Not applicable |
|---------------------------------------------------------------------------------------------------------------------------------------------------------------------------------|----------------------|--------------------|----------------|----------------|
| To learn that I do not carry the mutation.                                                                                                                                      |                      |                    |                |                |
| To make decisions about having (more) children.                                                                                                                                 |                      |                    |                |                |
| To alter priorities (personal, career, etc) if mutation is present.                                                                                                             |                      |                    |                |                |
| To be able to psychologically prepare myself for what lies ahead if the test reveals that I carry the mutation.                                                                 |                      |                    |                |                |
| If the test reveals that I carry the mutation, I would want to be identified early on so that I could be eligible for Parkinson prevention/treatment trials present and future. |                      |                    |                |                |
| I will regret taking the test if a mutation is identified.                                                                                                                      |                      |                    |                |                |
| Participating in genetic testing is against my personal moral code.                                                                                                             |                      |                    |                |                |
| Knowing whether I have the mutation would not change what I am going to do anyway.                                                                                              |                      |                    |                |                |
| There is no effective cure/treatment for Parkinson disease.                                                                                                                     |                      |                    |                |                |
| I do not know enough about the test.                                                                                                                                            |                      |                    |                |                |
| I do not think the test is accurate enough.                                                                                                                                     |                      |                    |                |                |
| My family thinks that I should not have genetic testing.                                                                                                                        |                      |                    |                |                |
| My healthcare provider thinks that I should not have genetic testing.                                                                                                           |                      |                    |                |                |
| I am presently diagnosed with a different medical                                                                                                                               |                      |                    |                |                |

|                                                                            |  |  |  |  |
|----------------------------------------------------------------------------|--|--|--|--|
| condition that affects my life span.                                       |  |  |  |  |
| I am worried that the results will not remain confidential.                |  |  |  |  |
| I am worried about losing my health insurance.                             |  |  |  |  |
| I am worried about losing my disability insurance.                         |  |  |  |  |
| I am afraid that I would lose my job/be discriminated by future employers. |  |  |  |  |

|                                                                                                                                                            | Definitely take the test | Definitely not take the test | Take the test only if covered by insurance | Unsure |
|------------------------------------------------------------------------------------------------------------------------------------------------------------|--------------------------|------------------------------|--------------------------------------------|--------|
| If a genetic test existed to determine how likely you were to benefit from a particular medication to lessen/improve Parkinson disease symptoms, you would |                          |                              |                                            |        |
| If a genetic test existed to determine how likely you were to develop side effects from a particular medication to treat your Parkinson disease            |                          |                              |                                            |        |

What people in your life influence your decision making?

|                                                  | Yes | No |
|--------------------------------------------------|-----|----|
| No one                                           |     |    |
| Coworkers                                        |     |    |
| Parents                                          |     |    |
| Spiritual leader (rabbi, priest, minister, etc.) |     |    |
| Friends                                          |     |    |
| Siblings                                         |     |    |
| Children                                         |     |    |
| Spouse                                           |     |    |

|                                                                                                                                                 | Yes | No |
|-------------------------------------------------------------------------------------------------------------------------------------------------|-----|----|
| If you had genetic testing, would you share the results of your test with relatives regardless of the result?                                   |     |    |
| If you had genetic testing would you share the results of your test with relatives only if the test indicated that you did not have a mutation? |     |    |

If you would share results, whom would you share them with?

|               | Yes | No |
|---------------|-----|----|
| No one        |     |    |
| Employer      |     |    |
| Grandparents  |     |    |
| Aunts/Uncles  |     |    |
| Cousins       |     |    |
| Grandchildren |     |    |
| Friends       |     |    |

|          |  |  |
|----------|--|--|
| Parents  |  |  |
| Siblings |  |  |
| Children |  |  |
| Spouse   |  |  |
